# Supplementary material for: Molecular mechanism of the interaction between resveratrol and trypsin via spectroscopy and molecular docking
Source: Royal Society of Chemistry journal article supplement (doi:10.1039/c9fo00183b), 2019-01-01
Supplement: c9fo00183b1.pdf [file c9fo00183b1.pdf]

Revised Electronic Supplementary Information

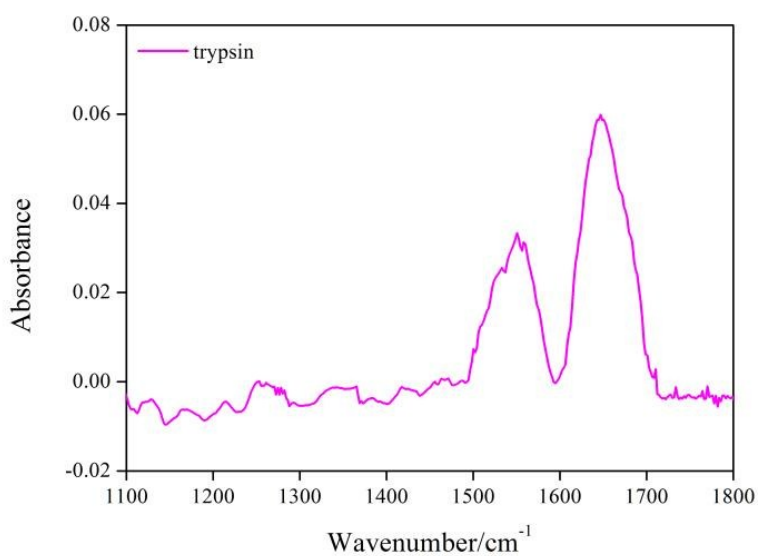

Figure 1. The FT-IR spectra of trypsin at 1100-1800cm<sup>-1</sup>( spectra of trypsin solution minus spectra of buffer solution).

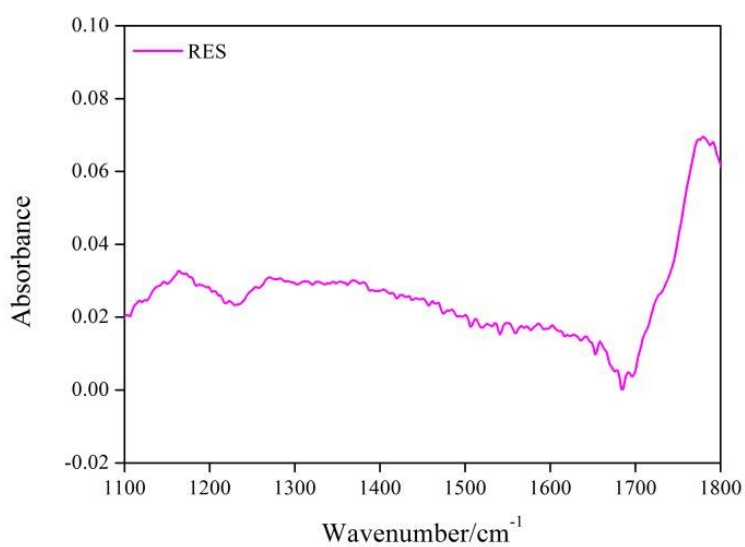

Figure 2. The FT-IR spectrum of RES at 1100-1800cm<sup>-1</sup>( spectra of RES solution minus spectra of buffer solution)

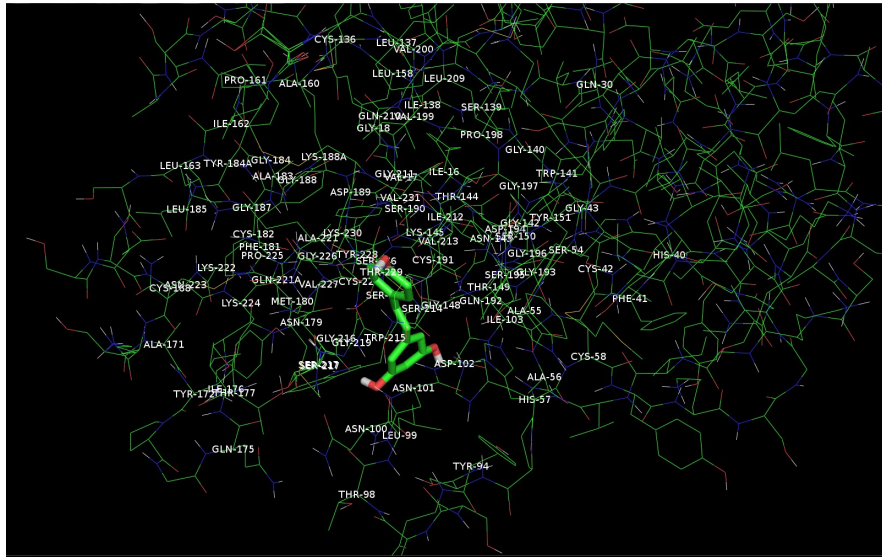

Fig.3 Molecular docking stereoview of resveratrol and trypsin (12 Å)
